# Supplementary material for: Kruppel-like factor4 regulates PRDM1 expression through binding to an autoimmune risk allele
Source: JCI journal article supplement (doi:10.1172/jci.insight.89569), 2017-01-11
Supplement: sd1 [file 1]

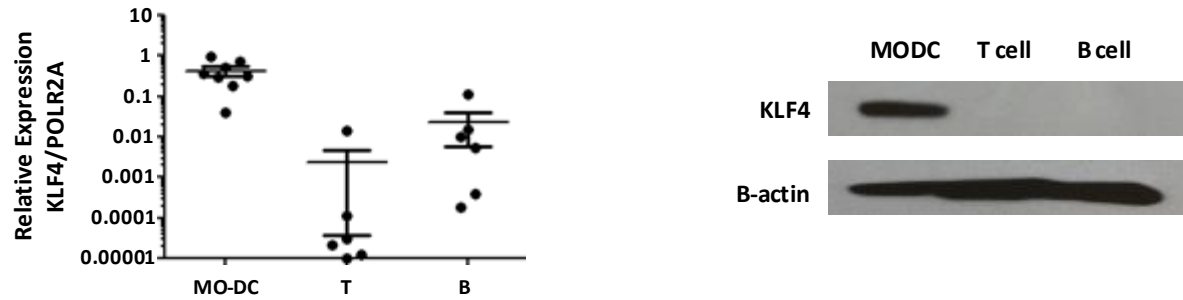

**Supplemental figure 1: KLF4 expression in MO-DCs, total T cells and total B cells in human PBMCs.**

Expression of *KLF4* was measured by qPCR (left graph) and western blotting (right panel). Total RNA was prepared from freshly isolated total T cells (CD3+/CD19-/CD14-), total B cells (CD3-/CD19+/CD14-) and monocyte (CD3-/CD19-/CD14+)-derived DCs (MO-DCs). Relative expression of *KLF4* was normalized to the level of housekeeping gene, *POLR2A*. Each dot represents an individual sample and the bar represents the mean ± SEM. To measure *KLF4* protein, freshly isolated total T cells, total B cells or MO-DCs were lysed in RIPA buffer and 40 µg of protein was applied to each lane. A representative image from three independent experiments.

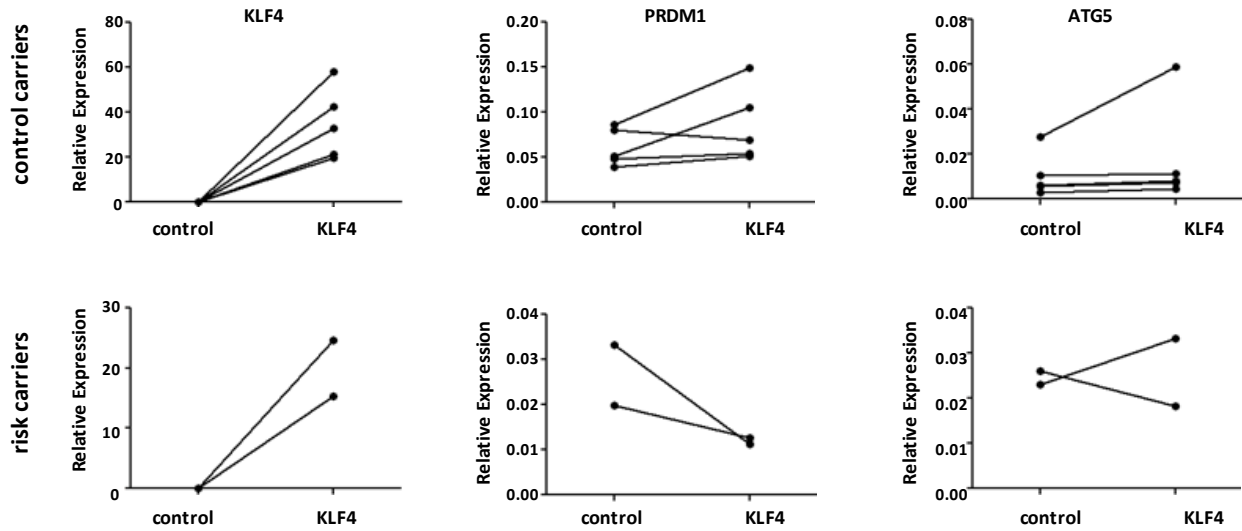

**Supplemental figure 2: Decreased level of PRDM1 in KLF4 overexpressing MO-DCs with risk SNP.** MO-DCs prepared from either control carriers (upper row) or risk carriers (bottom row) were transfected with 5 mg of control or KLF4 plasmid on day 5 of differentiation. After 48 hours, transfection efficiency was measured by GFP expression and total RNA was purified and converted into cDNA. Expression of KLF4, PRDM1 and ATG5 was measured by qPCR and relative expression was normalized to the level of the housekeeping gene, HPRT1. Each line represents an individual sample. Statistical test was not performed due to a low number of samples in the risk carrier group.
